# Supplementary material for: Entanglement beating in free space through spin–orbit coupling
Source: PubMed Central journal article supplement (PMC6060074; doi:10.1038/lsa.2018.9), 2018-05-04
Supplement: lsa20189x1.pdf [file lsa20189x1.pdf]

# Supplementary information for: Entanglement beating in free space through spin-orbit coupling

Eileen Otte,<sup>1</sup> Carmelo Rosales-Guzmán,<sup>2,\*</sup> Bienvenu Ndagano,<sup>2</sup> Cornelia Denz,<sup>1</sup> and Andrew Forbes<sup>2</sup>

<sup>1</sup>*Institute of Applied Physics, University of Muenster, Corrensstr. 2/4, D-48149 Muenster, Germany*

<sup>2</sup>*School of Physics, University of the Witwatersrand, Private Bag 3, Wits 2050, South Africa*

## Superposition of counter-propagating orthogonal vector fields – Theory

The realisation of the light field  $|\Psi(x, y, z)\rangle$  with a spatially varying degree of entanglement  $E(|\Psi\rangle, z)$  was obtained by combining two orthogonal vector beams  $\text{VB}_1$  and  $\text{VB}_2$  propagating in opposite  $z$ -directions. These vector modes represented by  $|\Psi_{\text{VB}_1}^+\rangle$  and  $|\Psi_{\text{VB}_2}^-\rangle$  are generated by setting  $\alpha_{\text{VB}_1} = 0$  and  $\alpha_{\text{VB}_2} = \pi/2$ , respectively, with  $\ell = \ell_1 = -\ell_2$  and  $p = p_1 = p_2$ . The resulting light field of the superposition can be written as

$$\begin{aligned} |\Psi\rangle &= \frac{1}{\sqrt{2}} (|\Psi_{\text{VB}_1}^+\rangle + |\Psi_{\text{VB}_2}^-\rangle) \\ &= \frac{1}{2} (|LG_p^\ell\rangle|R\rangle + |LG_p^{-\ell}\rangle|L\rangle) \cdot e^{ik_z z} \\ &\quad + \frac{1}{2} (e^{i\frac{\pi}{2}} |LG_p^\ell\rangle|R\rangle + e^{-i\frac{\pi}{2}} |LG_p^{-\ell}\rangle|L\rangle) \cdot e^{-ik_z z}. \end{aligned} \quad (\text{S1})$$

Regrouping terms with same polarisation leads to

$$\begin{aligned} |\Psi\rangle &= \frac{1}{2} (e^{ik_z z} + i e^{-ik_z z}) |LG_p^\ell\rangle|R\rangle \\ &\quad + \frac{1}{2} (e^{ik_z z} - i e^{-ik_z z}) |LG_p^{-\ell}\rangle|L\rangle, \end{aligned} \quad (\text{S2})$$

which is Eq. (6) of the main text.

## A tripartite GHZ-like description

Interestingly, Eq. (S2) can also be written as a tripartite classically entangled GHZ-like state between longitudinal position, polarisation and transverse degrees of freedom [1]. For this, notice that the exponential terms in Eq. (S2) can be written as

$$\begin{aligned} \frac{1}{2} (e^{ik_z z} + i e^{-ik_z z}) &= e^{i\pi/4} \cos(k_z z - \pi/4), \\ \frac{1}{2} (e^{ik_z z} - i e^{-ik_z z}) &= e^{3i\pi/4} \sin(k_z z - \pi/4). \end{aligned} \quad (\text{S3})$$

If we define Eq. S3 as,

$$\begin{aligned} e^{i\pi/4} \cos(k_z z - \pi/4) &\equiv \langle z|C\rangle \\ e^{3i\pi/4} \sin(k_z z - \pi/4) &\equiv \langle z|S\rangle, \end{aligned} \quad (\text{S4})$$

where  $|C\rangle$  and  $|S\rangle$  are two orthogonal state vectors, equation (S2) now becomes

$$|\Psi\rangle = |C\rangle |LG_p^\ell\rangle|R\rangle + |S\rangle |LG_p^{-\ell}\rangle|L\rangle. \quad (\text{S5})$$

In this representation, observation of a particular polarisation state can be done by projecting onto the operator  $|z\rangle\langle z|$ . Moreover, a maximally entangled state is obtained for all  $z$  values that satisfies  $|\langle z|C\rangle| = |\langle z|S\rangle|$ , namely  $z = n\lambda/4$ ,  $n \in \mathbb{N}$ .

## Non-separability in orthogonal superpositions of vector fields – Theory

The degree of non-separability of a vector field given by

$$|\Psi\rangle = \sqrt{a} \cdot |u_R\rangle|R\rangle + \sqrt{1-a} \cdot |u_L\rangle|L\rangle, \quad (\text{S6})$$

can be computed as [2]

$$E(|\Psi\rangle) = -[a \cdot \log_2(a) + (1-a) \cdot \log_2(1-a)]. \quad (\text{S7})$$

Comparing Eqs. (S2) and (S6) and considering that  $|u_{R,L}\rangle = |LG_p^{\pm\ell}\rangle \cdot e^{i\zeta_{R,L}}$ , one can see that

$$\begin{aligned} \sqrt{a} \cdot e^{i\zeta_R} &= \frac{1}{2} (e^{ik_z z} + i e^{-ik_z z}) \\ &= \frac{1}{2} [\cos(k_z z) + \sin(k_z z)] \cdot (1+i). \end{aligned} \quad (\text{S8})$$

From which,  $\zeta_R = \pi/4$  ( $= -\zeta_L$ ) and

$$\sqrt{a} = \left| \frac{1}{2} [\cos(k_z z) + \sin(k_z z)] \cdot (1+i) \right|, \quad (\text{S9})$$

that is,

$$\begin{aligned} a &= \frac{1}{4} [\cos(k_z z) + \sin(k_z z)]^2 \cdot 2 \\ &= \frac{1}{2} [1 + \sin(2k_z z)]. \end{aligned} \quad (\text{S10})$$

Substitution of Eq. (S10) into Eq. (S7) yields

$$\begin{aligned} E(|\Psi\rangle, z) &= -\frac{1}{2} [1 + \sin(2k_z z)] \log_2 \left\{ \frac{1}{2} [1 + \sin(2k_z z)] \right\} - \\ &\quad \frac{1}{2} [1 - \sin(2k_z z)] \log_2 \left\{ \frac{1}{2} [1 - \sin(2k_z z)] \right\}, \end{aligned} \quad (\text{S11})$$

which can be written as Eq (7) of the main text, namely

$$\begin{aligned} E(|\Psi\rangle, z) &= 1 - \frac{1}{2} [1 + \sin(2k_z z)] \cdot \log_2 [1 + \sin(2k_z z)] - \\ &\quad \frac{1}{2} [1 - \sin(2k_z z)] \cdot \log_2 [1 - \sin(2k_z z)]. \end{aligned} \quad (\text{S12})$$

\* Email: carmelo.rosalesguzman@wits.ac.za

### Counter-propagating higher-order vector and scalar modes

The realisation of spatially varying degree of entanglement of the form  $E(|\Psi\rangle, z)$  is not only facilitated by first-order vector modes with  $\ell = 1$  and  $p = 0$  but also by the application of higher-order modes [3] with  $|\ell| > 1$  and  $p > 0$ . In this case, vector modes  $|\Psi_{\text{VB}_1}^+\rangle$  and  $|\Psi_{\text{VB}_2}^-\rangle$  still represent counter-propagating, orthogonal modes, whereby  $\ell = \ell_1 = -\ell_2$  and  $p = p_1 = p_2$  for both vector modes, as indicated within the theoretical description above. Further, an appropriate choice of  $\alpha_{\text{VB}_{1,2}}$  ensures the modes' orthogonality. If these requirements are fulfilled, different light fields  $|\Psi\rangle$  can be created. Figure S1 sketches two examples of these fields with (a)  $\ell = 2$ ,  $p = 0$  and (b)  $\ell = 2$ ,  $p = 1$  ( $\alpha_{\text{VB}_1} = 0$ ,  $\alpha_{\text{VB}_2} = \pi/2$  for both cases). Here, different transverse planes of  $|\Psi\rangle$  (normalised intensity + polarisation) are illustrated for chosen propagation distances  $z$ . The respective degree of entanglement  $E$  is visualized by the red curve between (a) and (b), whereby the arrow shows corresponding values of  $k_z z + \varphi$  with  $[0, \pi/2]$  and  $[\pi/2, \pi]$  belonging to first and second line of (a) and (b). Initial vector modes propagating in  $+z$ - and  $-z$ -direction are indicated at the left and right edge, respectively. Note that, function  $E(|\Psi\rangle, z)$  is independent of chosen mode numbers  $\ell$  and  $p$ , even if other characteristics as intensity and polarisation of respective light field  $|\Psi\rangle$  change according to  $\ell$  and  $p$ .

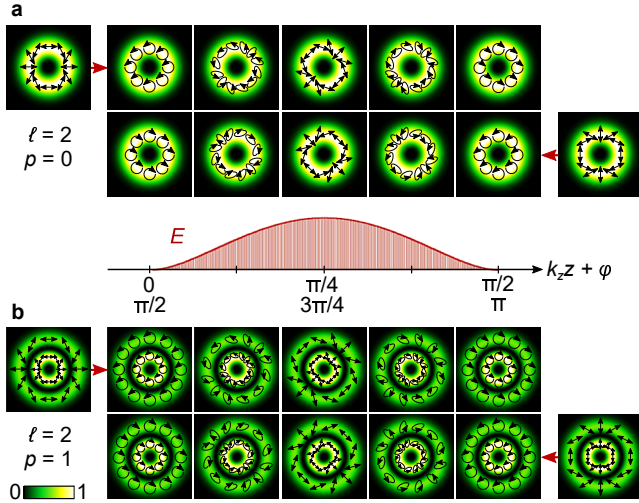

**Figure S1:** Space-variant degree of entanglement by counter-propagating vector modes of higher order with (a)  $\ell = 2$ ,  $p = 0$  and (b)  $\ell = 2$ ,  $p = 1$ . Initial modes are shown at the right and left edge, whereby central images present different transverse planes (intensity + polarisation) within  $|\Psi\rangle$ . Respective degree of entanglement  $E$  depending on  $k_z z + \varphi$  is depicted by red curve ( $\varphi = -\pi/4$ ).

In contrast to counter-propagating, orthogonally polarised vector modes, scalar modes cannot be used to realise the spatially varying degree of entanglement. Considering two counter-propagating scalar modes  $|\Psi_{\text{sc},1}^+\rangle$

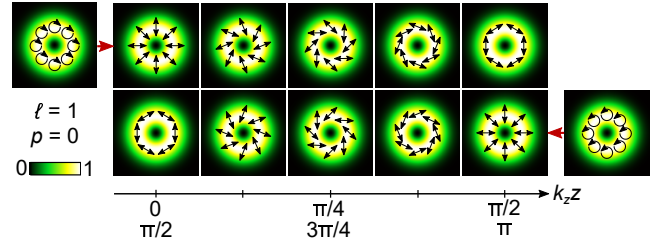

**Figure S2:** Counter-propagating scalar modes of opposite helical charge ( $\ell = \pm 1$ ) and polarisation ( $|R\rangle$ ,  $|L\rangle$ ): Initial modes are shown at the right and left edge, whereby central images present different transverse planes (intensity + polarisation) within  $|\Psi\rangle = \frac{1}{\sqrt{2}} (|\Psi_{\text{sc},1}^+\rangle + |\Psi_{\text{sc},2}^-\rangle)$  (first row belongs to  $k_z z \in [0, \pi/2]$ , second to  $k_z z \in [\pi/2, \pi]$ ). Respective degree of entanglement is spatially constant with  $E(|\Psi\rangle) = 1 \forall z$ .

and  $|\Psi_{\text{sc},2}^-\rangle$  of opposite helicity and circular polarisation, the resulting light field  $|\Psi\rangle$  is represented by

$$\begin{aligned} |\Psi\rangle &= \frac{1}{\sqrt{2}} (|\Psi_{\text{sc},1}^+\rangle + |\Psi_{\text{sc},2}^-\rangle) \\ &= \frac{1}{\sqrt{2}} (e^{\pm i k_z z} |LG_p^\ell\rangle |R\rangle + e^{\mp i k_z z} |LG_p^{-\ell}\rangle |L\rangle) \\ &= \sqrt{a} |u_R\rangle |R\rangle + \sqrt{1-a} |u_L\rangle |L\rangle. \end{aligned} \quad (\text{S13})$$

In this case, the spatial modes are given by  $|u_R\rangle = e^{\pm i k_z z} |LG_p^\ell\rangle$  and  $|u_L\rangle = e^{\mp i k_z z} |LG_p^{-\ell}\rangle$  with  $\langle u_{L,R} | u_{R,L} \rangle = 0$ . Consequently, the factor  $a = 1/2$  is spatially independent resulting in a constant degree of entanglement of  $E(|\Psi\rangle) = 1 (\forall z)$ . The respective light field for  $\ell = 1$ ,  $p = 0$  and  $\varphi = 0$  is shown in Fig. S2. Here, in each  $z$ -plane a vector mode is realized.

### Spin-orbit interaction

To calculate the spin and orbit components of our field, we express the total angular momentum in the  $z$ -direction as [4]

$$J_z = \frac{\int \text{Im} \{ \mathbf{E}^* \cdot \partial_\phi \mathbf{E} + \mathbf{e}_z \cdot \mathbf{E}^* \times \mathbf{E} \} d\mathbf{R}}{\int \mathbf{E}^* \cdot \mathbf{E} d\mathbf{R}} \quad (\text{S14})$$

where the terms have their usual meaning. It is easy to show that this integral is zero for the  $\ell = \pm 1$  subspace for the entire standing wave. We can calculate the spin and orbital components separately as

$$S_z \propto \int \text{Im} \{ E_x^* E_y - E_y^* E_x \} dA \quad (\text{S15})$$

$$L_z \propto \int \text{Im} \{ E_x^* \partial_\phi E_x + E_y^* \partial_\phi E_y \} dA \quad (\text{S16})$$

where here the  $x$  and  $y$  subscripts refer to the field components of the initial superposition but written in

the horizontal and vertical basis, i.e.,  $|\Psi\rangle = E_x\hat{x} + E_y\hat{y}$ . After some algebra one can show that these terms become

$$E_x = \frac{1}{\sqrt{2}} [e^{-ik_z z} \cos(\ell\phi) - e^{ik_z z} \sin(\ell\phi)] \quad (\text{S17})$$

and

$$E_y = \frac{1}{\sqrt{2}} [e^{-ik_z z} \sin(\ell\phi) - e^{ik_z z} \cos(\ell\phi)] \quad (\text{S18})$$

which after substitution into the above, we find (after some simple algebra):  $S_z \propto \sin(2k_z z)$  and  $L_z \propto -|\ell| \sin(2k_z z)$ . We have a sum that reflects a coupling between spin and orbit components, with one increasing as the other decreases:  $J_z \propto (1 - |\ell|) \sin(2k_z z)$ . For the  $\ell = \pm 1$  subspace the sum always adds to zero so that the total angular momentum is conserved through this SO coupling.

- 
- [1] Balthazar WF, Souza CER, Caetano DP, Galvão EF, Huguenin JAO, and Khoury AZ. Tripartite nonseparability in classical optics. *Opt. Lett.* 2016; **41**: 5797–5800.
- [2] McLaren M, Konrad T, and Forbes A. Measuring the nonseparability of vector vortex beams. *Phys. Rev. A* 2015; **92**: 023833.
- [3] Otte E, Alpmann C, and Denz C. Higher-order polarization singularities in tailored vector beams. *J. Opt.* 2016; **18**:074012.
- [4] Berry MV, Jeffrey MR, and Mansuripur M. Orbital and spin angular momentum in conical diffraction. *Journal of Optics A: Pure and Applied Optics* 2005; **7**: 685.
